# Supplementary material for: Definition of mechanisms of viral protein multifunctionality reveals key roles of ‘conformer diversity’ and RNA interaction in forming host interfaces
Source: Research Square preprint supplement (doi:10.21203/rs.3.rs-3915792/v1), 2024-02-01
Supplement: Supplementary file 1 [file 59174034dcb00fe2ec539c14.docx]

**Supplementary Table 3. Cross-linking Mass Spectrometry data for CVS P1, P3, P3-KRm and P3-D289N**a

| CVS P1 | | | | | | | | |
| --- | --- | --- | --- | --- | --- | --- | --- | --- |
| Id | Score | PepPos1 | PepSeq1 | LinkPos1 | PepPos2 | PepSeq2 | LinkPos2 |
| 1 | 294.44 | 152 | ELKKETTSAFSQR | 4 | 140 | SSEDKSTQTTGR | 5 |
| 2 | 344.42 | 56 | LHLDDEKSSNLGEMVR | 7 | 139 | RSSEDKSTQTTGR | 6 |
| 3 | 380.02 | 72 | VGEGKYREDFQMDEGEDPNLLFQSYLDNVGVQIVR | 5 | 56 | LHLDDEKSSNLGEMVR | 7 |
| 4 | 253.88 | 283 | LSKIMQDDLNR | 3 | 72 | VGEGKYR | 5 |
| 5 | 47.94 | 56 | LHLDDEKSSNLGEMVR | 7 | 165 | ESQPSKAR | 6 |
| 6 | 119.29 | 31 | NIEDNQAHLQGEPIEVDNLPEDMKR | 24 | 140 | SSEDKSTQTTGR | 5 |
| 7 | 200.96 | 1 | GSKIFVNPSAIR | 3 | 72 | VGEGKYR | 5 |
| 8 | 347.99 | 56 | LHLDDEKSSNLGEMVR | 7 | 155 | KETTSAFSQR | 1 |
| 9 | 254.3 | 31 | NIEDNQAHLQGEPIEVDNLPEDMKR | 24 | 155 | KETTSAFSQR | 1 |
| 10 | 347.99 | 56 | LHLDDEKSSNLGEMVR | 7 | 213 | YKFPSR | 2 |
| 12 | 339.88 | 31 | NIEDNQAHLQGEPIEVDNLPEDMKR | 24 | 56 | LHLDDEKSSNLGEMVR | 7 |
| 14 | 65.22 | 56 | LHLDDEKSSNLGEMVR | 7 | 1 | GSKIFVNPSAIR | 3 |
| 18 | 171.62 | 72 | VGEGKYREDFQMDEGEDPNLLFQSYLDNVGVQIVR | 5 | 31 | NIEDNQAHLQGEPIEVDNLPEDMKR | 24 |
| 20 | 164.72 | 219 | SSGIFLYNFEQLKMNLDDIVK | 13 | 56 | LHLDDEKSSNLGEMVR | 7 |
| 21 | 228.44 | 114 | FLKIWSQTVEEIVSYVTVNFPNPPRR | 3 | 31 | NIEDNQAHLQGEPIEVDNLPEDMKR | 24 |
| 22 | 118.48 | 114 | FLKIWSQTVEEIVSYVTVNFPNPPRR | 3 | 56 | LHLDDEKSSNLGEMVR | 7 |
| 23 | 99.67 | 72 | VGEGKYREDFQMDEGEDPNLLFQSYLDNVGVQIVR | 5 | 114 | FLKIWSQTVEEIVSYVTVNFPNPPRR | 3 |
| 24 | 241.35 | 140 | SSEDKSTQTTGR | 5 | 213 | YKFPSR | 2 |
| 28 | 191.89 | 140 | SSEDKSTQTTGR | 5 | 72 | VGEGKYR | 5 |
| 29 | 183.99 | 283 | LSKIMQDDLNR | 3 | 213 | YKFPSR | 2 |
| 31 | 268.03 | 273 | KFQLLVEADKLSK | 1 | 72 | VGEGKYR | 5 |
| 35 | 246.86 | 56 | LHLDDEKSSNLGEMVR | 7 | 273 | KFQLLVEADK | 1 |
| 33 | 41.69 | 1 | SKIFVNPSAIR | 2 | 155 | KETTSAFSQR | 1 |
| 25 | 45.02 | 1 | SKIFVNPSAIR | 2 | 232 | MNLDDIVKEAK | 8 |
| 19 | 42.38 | 1 | SKIFVNPSAIR | 2 | 166 | SQPSKAR | 5 |
| 39 | 40.97 | 145 | STQTTGRELKKETTSAFSQR | 11 | 240 | EAKNVPGVTR | 3 |
| 34 | 46.12 | 155 | KETTSAFSQR | 1 | 213 | YKFPSR | 2 |
| 32 | 40.82 | 145 | STQTTGRELKKETTSAFSQR | 11 | 250 | LAHDGSKIPLR | 7 |
| 67 | 47.29 | 273 | KFQLLVEADKLSK | 1 | 140 | SSEDKSTQTTGR | 5 |
| 37 | 43.73 | 232 | MNLDDIVKEAKNVPGVTR | 11 | 140 | SSEDKSTQTTGR | 5 |
| 76 | 44.17 | 219 | SSGIFLYNFEQLKMNLDDIVK | 13 | 273 | KFQLLVEADKLSK | 1 |
| 42 | 49.01 | 274 | FQLLVEADKLSKIMQDDLNR | 12 | 212 | KYAFPSR | 1 |
| 89 | 48.64 | 155 | KETTSAFSQR | 1 | 212 | KYAFPSR | 1 |

| CVS P3 | | | | | | | | |
| --- | --- | --- | --- | --- | --- | --- | --- | --- |
| Id | Score | PepPos1 | PepSeq1 | LinkPos1 | PepPos2 | PepSeq2 | LinkPos2 |
| 1 | 317.34 | 72 | VGEGKYREDFQMDEGEDPNLLFQSYLDNVGVQIVR | 5 | 139 | RSSEDKSTQTTGR | 6 |
| 2 | 257.13 | 232 | MNLDDIVKEAKNVPGVTR | 11 | 140 | SSEDKSTQTTGR | 5 |
| 3 | 283.15 | 140 | SSEDKSTQTTGR | 5 | 213 | YKFPSR | 2 |
| 4 | 269.91 | 55 | RLHLDDEKSSNLGEMVR | 8 | 139 | RSSEDKSTQTTGR | 6 |
| 5 | 64 | 56 | LHLDDEKSSNLGEMVR | 7 | 165 | ESQPSKAR | 6 |
| 8 | 250.78 | 283 | LSKIMQNDLNR | 3 | 72 | VGEGKYR | 5 |
| 9 | 333.31 | 72 | VGEGKYREDFQMDEGEDPNLLFQSYLDNVGVQIVR | 5 | 56 | LHLDDEKSSNLGEMVR | 7 |
| 10 | 284.74 | 283 | LSKIMQNDLNR | 3 | 213 | YKFPSR | 2 |
| 11 | 404.47 | 56 | LHLDDEKSSNLGEMVR | 7 | 155 | KETTSAFSQR | 1 |
| 12 | 313.3 | 108 | LHLDDGKLPDLGR | 7 | 121 | MSKAGEGR | 3 |
| 14 | 353.62 | 56 | LHLDDEKSSNLGEMVR | 7 | 213 | YKFPSR | 2 |
| 15 | 346.18 | 56 | LHLDDEKSSNLGEMVR | 7 | 283 | LSKIMQNDLNR | 3 |
| 16 | 372.9 | 56 | LHLDDEKSSNLGEMVR | 7 | 273 | KFQLLVEADK | 1 |
| 18 | 49.54 | 72 | VGEGKYREDFQMDEGEDPNLLFQSYLDNVGVQIVR | 5 | 213 | YKFPSR | 2 |
| 20 | 113.26 | 219 | SSGIFLYNFEQLKMNLDDIVK | 13 | 56 | LHLDDEKSSNLGEMVR | 7 |
| 21 | 300.7 | 219 | SSGIFLYNFEQLKMNLDDIVK | 13 | 273 | KFQLLVEADKLSK | 1 |
| 22 | 125.31 | 114 | FLKIWSQTVEEIVSYVTVNFPNPPRR | 3 | 56 | LHLDDEKSSNLGEMVR | 7 |
| 26 | 257.2 | 152 | ELKKETTSAFSQR | 4 | 140 | SSEDKSTQTTGR | 5 |
| 30 | 336.16 | 273 | KFQLLVEADKLSK | 1 | 140 | SSEDKSTQTTGR | 5 |
| 31 | 275.11 | 283 | LSKIMQNDLNR | 3 | 273 | KFQLLVEADK | 1 |
| 32 | 284.24 | 56 | LHLDDEKSSNLGEMVR | 7 | 232 | MNLDDIVKEAK | 8 |
| 33 | 58.66 | 283 | LSKIMQDDLNR | 3 | 165 | ESQPSKAR | 6 |
| 41 | 221.44 | 274 | FQLLVEADKLSKIMQDDLNR | 12 | 155 | KETTSAFSQR | 1 |
| 42 | 179.2 | 274 | FQLLVEADKLSKIMQDDLNR | 12 | 212 | KYAFPSR | 1 |

|  |  |  |  |  |  |  |  |
| --- | --- | --- | --- | --- | --- | --- | --- |
| CVS P3 KRm | | | | | | | |
| Id | Score | PepPos1 | PepSeq1 | LinkPos1 | PepPos2 | PepSeq2 | LinkPos2 |
| 1 | 317.34 | 72 | VGEGKYREDFQMDEGEDPNLLFQSYLDNVGVQIVR | 5 | 139 | RSSEDKSTQTTGR | 6 |
| 2 | 257.13 | 232 | MNLDDIVKEAKNVPGVTR | 11 | 140 | SSEDKSTQTTGR | 5 |
| 4 | 269.91 | 55 | RLHLDDEKSSNLGEMVR | 8 | 139 | RSSEDKSTQTTGR | 6 |
| 5 | 64 | 56 | LHLDDEKSSNLGEMVR | 7 | 165 | ESQPSKAR | 6 |
| 9 | 333.31 | 72 | VGEGKYREDFQMDEGEDPNLLFQSYLDNVGVQIVR | 5 | 56 | LHLDDEKSSNLGEMVR | 7 |
| 11 | 404.47 | 56 | LHLDDEKSSNLGEMVR | 7 | 155 | KETTSAFSQR | 1 |
| 12 | 313.3 | 108 | LHLDDGKLPDLGR | 7 | 121 | MSKAGEGR | 3 |
| 21 | 300.7 | 219 | SSGIFLYNFEQLKMNLDDIVK | 13 | 273 | KFQLLVEADKLSK | 1 |
| 22 | 125.31 | 114 | FLKIWSQTVEEIVSYVTVNFPNPPRR | 3 | 56 | LHLDDEKSSNLGEMVR | 7 |
| 26 | 257.2 | 152 | ELKKETTSAFSQR | 4 | 140 | SSEDKSTQTTGR | 5 |
| 28 | 194.8 | 139 | RSSEDKSTQTTGR | 6 | 140 | SSEDKSTQTTGR | 5 |
| 30 | 336.16 | 273 | KFQLLVEADKLSK | 1 | 140 | SSEDKSTQTTGR | 5 |
| 31 | 275.11 | 283 | LSKIMQNDLNR | 3 | 273 | KFQLLVEADK | 1 |

| CVS P3 D289N | | | | | | | | |
| --- | --- | --- | --- | --- | --- | --- | --- | --- |
| Id | Score | PepPos1 | PepSeq1 | LinkPos1 | PepPos2 | PepSeq2 | LinkPos2 |
| 1 | 290.72 | 72 | VGEGKYREDFQMDEGEDPNLLFQSYLDNVGVQIVR | 5 | 140 | SSEDKSTQTTGR | 5 |
| 2 | 270.24 | 152 | ELKKETTSAFSQR | 4 | 140 | SSEDKSTQTTGR | 5 |
| 3 | 208.63 | 140 | SSEDKSTQTTGR | 5 | 212 | KYAFPSR | 1 |
| 5 | 380.79 | 56 | LHLDDEKSSNLGEMVR | 7 | 139 | RSSEDKSTQTTGR | 6 |
| 7 | 291.2 | 56 | LHLDDEKSSNLGEMVR | 7 | 165 | ESQPSKAR | 6 |
| 8 | 58.66 | 283 | LSKIMQDDLNR | 3 | 165 | ESQPSKAR | 6 |
| 9 | 353.02 | 72 | VGEGKYREDFQMDEGEDPNLLFQSYLDNVGVQIVR | 5 | 56 | LHLDDEKSSNLGEMVR | 7 |
| 10 | 234.9 | 283 | LSKIMQDDLNR | 3 | 72 | VGEGKYR | 5 |
| 11 | 318.94 | 108 | LHLDDGKLPDLGR | 7 | 121 | MSKAGEGR | 3 |
| 12 | 286.03 | 108 | LHLDDGKLPDLGR | 7 | 140 | SSEDKSTQTTGR | 5 |
| 13 | 342.58 | 56 | LHLDDEKSSNLGEMVR | 7 | 155 | KETTSAFSQR | 1 |
| 14 | 104.64 | 56 | LHLDDEKSSNLGEMVR | 7 | 212 | KYAFPSR | 1 |
| 16 | 77.28 | 273 | KFQLLVEADKLSK | 1 | 212 | KYAFPSR | 1 |
| 18 | 191.53 | 283 | LSKIMQDDLNR | 3 | 273 | KFQLLVEADK | 1 |
| 19 | 326.81 | 56 | LHLDDEKSSNLGEMVR | 7 | 273 | KFQLLVEADKLSK | 1 |
| 21 | 50.97 | 72 | VGEGKYREDFQMDEGEDPNLLFQSYLDNVGVQIVR | 5 | 155 | KETTSAFSQR | 1 |
| 22 | 179.2 | 274 | FQLLVEADKLSKIMQDDLNR | 12 | 212 | KYAFPSR | 1 |
| 23 | 228.02 | 257 | IPLACVLGWVALANSKK | 16 | 155 | KETTSAFSQR | 1 |
| 24 | 183.89 | 257 | IPLACVLGWVALANSKK | 16 | 72 | VGEGKYR | 5 |
| 25 | 367.04 | 219 | SSGIFLYNFEQLKMNLDDIVK | 13 | 56 | LHLDDEKSSNLGEMVR | 7 |
| 26 | 282.65 | 219 | SSGIFLYNFEQLKMNLDDIVK | 13 | 273 | KFQLLVEADKLSK | 1 |
| 27 | 270.16 | 114 | FLKIWSQTVEEIVSYVTVNFPNPPRR | 3 | 56 | LHLDDEKSSNLGEMVR | 7 |
| 29 | 121.02 | 140 | SSEDKSTQTTGR | 5 | 240 | EAKNVPGVTR | 3 |
| 31 | 175.75 | 240 | EAKNVPGVTR | 3 | 72 | VGEGKYR | 5 |
| 32 | 284.24 | 56 | LHLDDEKSSNLGEMVR | 7 | 232 | MNLDDIVKEAK | 8 |
| 34 | 244.27 | 108 | LHLDDGKLPDLGR | 7 | 72 | VGEGKYR | 5 |
| 35 | 289.45 | 273 | KFQLLVEADKLSK | 1 | 140 | SSEDKSTQTTGR | 5 |
| 36 | 242.94 | 273 | KFQLLVEADKLSK | 10 | 140 | SSEDKSTQTTGR | 5 |
| 38 | 318.64 | 273 | KFQLLVEADKLSK | 1 | 72 | VGEGKYR | 5 |
| 39 | 178.84 | 155 | KETTSAFSQR | 1 | 212 | KYAFPSR | 1 |
| 41 | 221.44 | 274 | FQLLVEADKLSKIMQDDLNR | 12 | 155 | KETTSAFSQR | 1 |
| 43 | 200.67 | 250 | LAHDGSKIPLACVLGWVALANSK | 7 | 140 | SSEDKSTQTTGR | 5 |
| 44 | 284.74 | 283 | LSKIMQNDLNR | 3 | 213 | YKFPSR | 2 |

a crosslinks were filtered for identification score of >40 in XlinkX; PepPos1 and PepPos2 identifies the N-terminal residue of each peptide sequence (PepSeq1 and PepSeq2 respectively) that was crosslinked; LinkPos1 and LinkPos2 identifies the cross-linked Lys residues (indicated in bold within the peptide sequence).
