# Supplementary material for: Definition of mechanisms of viral protein multifunctionality reveals key roles of ‘conformer diversity’ and RNA interaction in forming host interfaces
Source: Research Square preprint supplement (doi:10.21203/rs.3.rs-3915792/v1), 2024-02-01
Supplement: Supplementary file 2 [file 703ae02880ecdc9ad10b9fc4.xlsx]

## Sheet: P3 Interactors - All Assays
Alt name	Protein	Assay 1	Assay 2	Assay 3	Assay 4	Count (from 4 assays)
		Number of significant peptides						Notes:	Proteins bound to GFP in each assay were removed
HNRNPAB	ROAA	17	7	2	2	4
RPL27	RL27	45	6	2	2	4		ND	Not detected
RPLP1	RLA1	8	5	2	2	4
RPS15	RS15	24	3	2	2	4
SNRPB	RSMB	2	4	3	2	4
RPL29	RL29	12	5	3	2	4
RPS27	RS27	15	5	4	2	4
MRPS28	RT28	5	3	4	2	4
MRPS23	RT23	13	7	5	2	4
RPL37A	RL37A	6	5	2	3	4
COX5A	COX5A	3	4	2	3	4
RPS24	RS24	13	6	2	3	4
RPL8	RL8	48	12	3	3	4
RPS9	RS9	19	6	4	3	4
RPL10	RL10	36	7	4	3	4
PGRMC1	PGRC1	3	8	6	3	4
ATAD3A	ATD3A	9	7	21	3	4
RUVBL1	RUVB1	4	2	2	4	4
PABP4	PABP4	7	3	2	4	4
RPL36AL	RL36L	9	3	2	4	4
RBM4	RBM4	7	6	3	4	4
PABP3	PABP3	8	5	4	4	4
RPL24	RL24	29	4	5	4	4
NOLC1	NOLC1	5	3	5	4	4
RPS17L	RS17L	17	5	7	4	4
RPL34	RL34	11	12	8	4	4
ATAD3B	ATD3B	7	7	18	4	4
RPL35	RL35	18	8	2	5	4
YBX3	YBOX3	7	13	4	5	4
RPL31	RL31	15	3	4	5	4
RPL22	RL22	6	9	4	5	4
RPLP2	RLA2	14	11	4	5	4
SRP9	SRP09	8	4	6	5	4
YBX1	YBOX1	19	17	4	6	4
IGF2BP1	IF2B1	23	6	4	6	4
RPL14	RL14	17	7	8	6	4
STAU1	STAU1	15	8	9	6	4
RPLP0	RLA0	26	6	11	6	4
SFPQ	SFPQ	14	14	9	7	4
H1X	H1X	9	12	9	8	4
RPL26	RL26	48	8	8	9	4
RBM14	RBM14	9	12	11	9	4
PABP1	PABP1	21	12	7	11	4
RPL35A	RL35A	19	13	14	11	4
RPS15A	RS15A	22	13	12	12	4
HNRPM	HNRPM	94	26	25	12	4
RPL28	RL28	27	17	12	17	4
RPL5	RL5	83	16	6	19	4
MRPS16	RT16	5	2	2	ND	3
ATP5ME	ATP5I	2	3	2	ND	3
KPNA2	IMA1	11	4	2	ND	3
COA3	COA3	3	5	2	ND	3
FAM98A	FA98A	3	2	2	ND	3
G3BP2	G3BP2	4	3	2	ND	3
MRPS26	RT26	6	7	2	ND	3
LA	LA	7	13	2	ND	3
MRPS18B	RT18B	4	3	2	ND	3
HNRNPUL1	HNRL1	5	2	3	ND	3
RFC4	RFC4	3	3	3	ND	3
RPL18A	RL18A	32	9	3	ND	3
DNAJA1	DNJA1	8	3	3	ND	3
STAU2	STAU2	2	2	3	ND	3
DDX17	DDX17	23	7	3	ND	3
MRPS31	RT31	5	2	3	ND	3
MRPS33	RT33	3	5	3	ND	3
MRPS27	RT27	2	3	4	ND	3
MRPS7	RT07	5	4	4	ND	3
CKMT1A	KCRU	2	14	4	ND	3
RUVBL2	RUVB2	5	4	5	ND	3
DAP3	RT29	7	4	6	ND	3
ATAD3C	ATD3C	4	2	7	ND	3
DDX5	DDX5	42	8	8	ND	3
TCOF1	TCOF	7	5	13	ND	3
C8orf33	CH033	5	4	ND	2	3
G3BP1	G3BP1	17	6	ND	2	3
SMD2	SMD2	ND	2	2	2	3
SSR4	SSRD	2	ND	2	2	3
COX6C	COX6C	2	ND	3	2	3
RPL9	RL9	2ND	5	3	2	3
HADHB	ECHB	4	ND	3	2	3
PGAM5	PGAM5	4	ND	3	2	3
RPL19	RL19	25	8	ND	3	3
COX4I1	COX41	2	ND	2	3	3
RPL3	RL3	66	1ND	2	3	3
MRPS22	RT22	12	ND	3	3	3
RPL6	RL6	ND	11	3	3	3
SERA	SERA	ND	5	4	3	3
HNRPU	HNRPU	49	ND	4	3	3
ATPO	ATPO	5	ND	5	3	3
NONO	NONO	11	ND	5	3	3
RPLP0P6	RLA0L	1ND	5	3	4	3
RPS29	RS29	8	ND	4	4	3
RPL36AL	RL36A	1ND	5	4	4	3
RBMXL1	RMXL1	4	6	ND	5	3
RPL30	RL30	1ND	7	5	5	3
RPS7	RS7	ND	9	8	5	3
RPL11	RL11	2ND	9	11	6	3
RBMX	RBMX	8	1ND	5	7	3
RPL17	RL17	ND	9	8	7	3
SRP14	SRP14	9	1ND	11	7	3
ILF3	ILF3	26	9	ND	7	3
RPL23	RL23	ND	7	8	9	3
RPL12	RL12	22	15	1ND	9	3
RPL13	RL13	52	ND	16	12	3
RPL7A	RL7A	48	ND	21	14	3
DYNLL2	DYL2	13	14	2ND	14	3
RPS2	RS2	ND	14	17	16	3
NPM	NPM	37	ND	34	18	3
DYNLL1	DYL1	32	ND	41	25	3
RPL26L1	RL26L	45	8	7	1ND	3
RPL10A	RL10A	35	13	17	1ND	3
RAB10	RAB10	5	2	2	ND	3
SLC25A31	ADT4	3	2	2	ND	3
TMPO	LAP2B	3	8	3	ND	3

## Sheet: Interactors associated with MLO
INTERACTOR	Entry	Protein names	Gene names			Nucleolus	Stress granules	Paraspeckles	Nuclear Speckles	P-Bodies
RPLP2	P05387	60S acidic ribosomal protein P2 (Large ribosomal subunit protein P2) (Renal carcinoma antigen NY-REN-44)	RPLP2 D11S2243E RPP2			Y						Lists of proteins components of MLOs derived from:
SSB	P05455	Lupus La protein (La autoantigen) (La ribonucleoprotein) (Sjoegren syndrome type B antigen) (SS-B)	SSB			Y			Y
NPM1	P06748	Nucleophosmin (NPM) (Nucleolar phosphoprotein B23) (Nucleolar protein NO38) (Numatrin)	NPM1 NPM			Y			Y			Nucleolus:	Andersen, J. S., et al. (2005). "Nucleolar proteome dynamics." Nature 433(7021): 77-83.
RPS17	P08708	40S ribosomal protein S17 (Small ribosomal subunit protein eS17)	RPS17 RPS17L			Y						Stress granules:	Youn, J. Y., et al. (2019). "Properties of Stress Granule and P-Body Proteomes." Mol Cell 76(2): 286-294.
RPS2	P15880	40S ribosomal protein S2 (40S ribosomal protein S4) (Protein LLRep3) (Small ribosomal subunit protein uS5)	RPS2 RPS4			Y						Paraspeckles:	Hennig, S., et al. (2015). "Prion-like domains in RNA binding proteins are essential for building subnuclear paraspeckles." J Cell Biol 210(4): 529-539.
DDX5	P17844	Probable ATP-dependent RNA helicase DDX5 (EC 3.6.4.13) (DEAD box protein 5) (RNA helicase p68)	DDX5 G17P1 HELR HLR1			Y			Y			Nuclear speckles:	Galganski, L., et al. (2017). "Nuclear speckles: molecular organization, biological function and role in disease." Nucleic Acids Res 45(18): 10350-10368.
RPL35A	P18077	60S ribosomal protein L35a (Cell growth-inhibiting gene 33 protein) (Large ribosomal subunit protein eL33)	RPL35A GIG33			Y						P-bodies:	Hubstenberger, A., et al. (2017). "P-Body Purification Reveals the Condensation of Repressed mRNA Regulons." Mol Cell 68(1): 144-157 e145.
RPL17	P18621	60S ribosomal protein L17 (60S ribosomal protein L23) (Large ribosomal subunit protein uL22) (PD-1)	RPL17			Y
SFPQ	P23246	Splicing factor, proline- and glutamine-rich (100 kDa DNA-pairing protein) (hPOMp100) (DNA-binding p52/p100 complex, 100 kDa subunit) (Polypyrimidine tract-binding protein-associated-splicing factor) (PSF) (PTB-associated-splicing factor)	SFPQ PSF			Y	Y	Y	Y
RPL13	P26373	60S ribosomal protein L13 (Breast basic conserved protein 1) (Large ribosomal subunit protein eL13)	RPL13 BBC1 OK/SW-cl.46			Y
RPL10	P27635	60S ribosomal protein L10 (Laminin receptor homolog) (Large ribosomal subunit protein uL16) (Protein QM) (Ribosomal protein L10) (Tumor suppressor QM)	RPL10 DXS648E QM			Y
RPL12	P30050	60S ribosomal protein L12 (Large ribosomal subunit protein uL11)	RPL12			Y
DNAJA1	P31689	DnaJ homolog subfamily A member 1 (DnaJ protein homolog 2) (HSDJ) (Heat shock 40 kDa protein 4) (Heat shock protein J2) (HSJ-2) (Human DnaJ protein 2) (hDj-2)	DNAJA1 DNAJ2 HDJ2 HSJ2 HSPF4			Y	Y		Y
RPL9	P32969	60S ribosomal protein L9 (Large ribosomal subunit protein uL6)	RPL9 OK/SW-cl.103; RPL9P7; RPL9P8; RPL9P9			Y
RFC4	P35249	Replication factor C subunit 4 (Activator 1 37 kDa subunit) (A1 37 kDa subunit) (Activator 1 subunit 4) (Replication factor C 37 kDa subunit) (RF-C 37 kDa subunit) (RFC37)	RFC4			Y	Y
RPL22	P35268	60S ribosomal protein L22 (EBER-associated protein) (EAP) (Epstein-Barr virus small RNA-associated protein) (Heparin-binding protein HBp15) (Large ribosomal subunit protein eL22)	RPL22			Y
SRP14	P37108	Signal recognition particle 14 kDa protein (SRP14) (18 kDa Alu RNA-binding protein)	SRP14			Y
RBMX	P38159	RNA-binding motif protein, X chromosome (Glycoprotein p43) (Heterogeneous nuclear ribonucleoprotein G) (hnRNP G) [Cleaved into: RNA-binding motif protein, X chromosome, N-terminally processed]	RBMX HNRPG RBMXP1			Y		Y	Y	Y
RPL3	P39023	60S ribosomal protein L3 (HIV-1 TAR RNA-binding protein B) (TARBP-B) (Large ribosomal subunit protein uL3)	RPL3 OK/SW-cl.32			Y
RPS27	P42677	40S ribosomal protein S27 (Metallopan-stimulin 1) (MPS-1) (Small ribosomal subunit protein eS27)	RPS27 MPS1			Y
RPL35	P42766	60S ribosomal protein L35 (Large ribosomal subunit protein uL29)	RPL35			Y
RPL5	P46777	60S ribosomal protein L5 (Large ribosomal subunit protein uL18)	RPL5 MSTP030			Y
RPL28	P46779	60S ribosomal protein L28 (Large ribosomal subunit protein eL28)	RPL28			Y
RPS9	P46781	40S ribosomal protein S9 (Small ribosomal subunit protein uS4)	RPS9			Y
RPL29	P47914	60S ribosomal protein L29 (Cell surface heparin-binding protein HIP) (Large ribosomal subunit protein eL29)	RPL29			Y
RPL34	P49207	60S ribosomal protein L34 (Large ribosomal subunit protein eL34)	RPL34			Y
SRP9	P49458	Signal recognition particle 9 kDa protein (SRP9)	SRP9			Y	Y
RPL14	P50914	60S ribosomal protein L14 (CAG-ISL 7) (Large ribosomal subunit protein eL14)	RPL14			Y
HNRNPM	P52272	Heterogeneous nuclear ribonucleoprotein M (hnRNP M)	HNRNPM HNRPM NAGR1			Y			Y	Y
KPNA2	P52292	Importin subunit alpha-1 (Karyopherin subunit alpha-2) (RAG cohort protein 1) (SRP1-alpha)	KPNA2 RCH1 SRP1			Y	Y
HNRNPU	Q00839	Heterogeneous nuclear ribonucleoprotein U (hnRNP U) (GRIP120) (Nuclear p120 ribonucleoprotein) (Scaffold-attachment factor A) (SAF-A) (p120) (pp120)	HNRNPU C1orf199 HNRPU SAFA U21.1			Y			Y	Y
RPL18A	Q02543	60S ribosomal protein L18a (Large ribosomal subunit protein eL20)	RPL18A			Y
RPL6	Q02878	60S ribosomal protein L6 (Large ribosomal subunit protein eL6) (Neoplasm-related protein C140) (Tax-responsive enhancer element-binding protein 107) (TaxREB107)	RPL6 TXREB1			Y
ILF3	Q12906	Interleukin enhancer-binding factor 3 (Double-stranded RNA-binding protein 76) (DRBP76) (M-phase phosphoprotein 4) (MPP4) (Nuclear factor associated with dsRNA) (NFAR) (Nuclear factor of activated T-cells 90 kDa) (NF-AT-90) (Translational control protein 80) (TCP80)	ILF3 DRBF MPHOSPH4 NF90			Y			Y	Y
TCOF1	Q13428	Treacle protein (Treacher Collins syndrome protein)	TCOF1			Y
NOLC1	Q14978	Nucleolar and coiled-body phosphoprotein 1 (140 kDa nucleolar phosphoprotein) (Nopp140) (Hepatitis C virus NS5A-transactivated protein 13) (HCV NS5A-transactivated protein 13) (Nucleolar 130 kDa protein) (Nucleolar phosphoprotein p130)	NOLC1 KIAA0035 NS5ATP13			Y
NONO	Q15233	Non-POU domain-containing octamer-binding protein (NonO protein) (54 kDa nuclear RNA- and DNA-binding protein) (55 kDa nuclear protein) (DNA-binding p52/p100 complex, 52 kDa subunit) (NMT55) (p54(nrb)) (p54nrb)	NONO NRB54			Y	Y	Y	Y
H1FX	Q92522	Histone H1x	H1FX			Y	Y
DDX17	Q92841	Probable ATP-dependent RNA helicase DDX17 (EC 3.6.4.13) (DEAD box protein 17) (DEAD box protein p72) (DEAD box protein p82) (RNA-dependent helicase p72)	DDX17			Y			Y
RBMXL1	Q96E39	RNA binding motif protein, X-linked-like-1 (Heterogeneous nuclear ribonucleoprotein G-like 1)	RBMXL1			Y				Y
HNRNPAB	Q99729	Heterogeneous nuclear ribonucleoprotein A/B (hnRNP A/B) (APOBEC1-binding protein 1) (ABBP-1)	HNRNPAB ABBP1 HNRPAB			Y	Y		Y
RBM4	Q9BWF3	RNA-binding protein 4 (Lark homolog) (hLark) (RNA-binding motif protein 4) (RNA-binding motif protein 4a)	RBM4 RBM4A			Y			Y
RPL26L1	Q9UNX3	60S ribosomal protein L26-like 1 (Large ribosomal subunit protein uL24-like 1)	RPL26L1 RPL26P1			Y
RUVBL2	Q9Y230	RuvB-like 2 (EC 3.6.4.12) (48 kDa TATA box-binding protein-interacting protein) (48 kDa TBP-interacting protein) (51 kDa erythrocyte cytosolic protein) (ECP-51) (INO80 complex subunit J) (Repressing pontin 52) (Reptin 52) (TIP49b) (TIP60-associated protein 54-beta) (TAP54-beta)	RUVBL2 INO80J TIP48 TIP49B CGI-46			Y			Y
RUVBL1	Q9Y265	RuvB-like 1 (EC 3.6.4.12) (49 kDa TATA box-binding protein-interacting protein) (49 kDa TBP-interacting protein) (54 kDa erythrocyte cytosolic protein) (ECP-54) (INO80 complex subunit H) (Nuclear matrix protein 238) (NMP 238) (Pontin 52) (TIP49a) (TIP60-associated protein 54-alpha) (TAP54-alpha)	RUVBL1 INO80H NMP238 TIP49 TIP49A			Y
ATAD3A	Q9NVI7	ATPase family AAA domain-containing protein 3A	ATAD3A				Y			Y
ATAD3B	Q5T9A4	ATPase family AAA domain-containing protein 3B (AAA-TOB3)	ATAD3B KIAA1273 TOB3
ATAD3C	Q5T2N8	ATPase family AAA domain-containing protein 3C	ATAD3C
ATP5ME	P56385	ATP synthase subunit e, mitochondrial (ATPase subunit e) (ATP synthase membrane subunit e) [Cleaved into: ATP synthase subunit e, mitochondrial, N-terminally processed]	ATP5ME ATP5I ATP5K
ATP5PO	P48047	ATP synthase subunit O, mitochondrial (ATP synthase peripheral stalk subunit OSCP) (Oligomycin sensitivity conferral protein) (OSCP)	ATP5PO ATP5O ATPO
C8orf33	Q9H7E9	UPF0488 protein C8orf33	C8orf33
CKMT1A	P12532	Creatine kinase U-type, mitochondrial (EC 2.7.3.2) (Acidic-type mitochondrial creatine kinase) (Mia-CK) (Ubiquitous mitochondrial creatine kinase) (U-MtCK)	CKMT1A CKMT; CKMT1B CKMT
COA3	Q9Y2R0	Cytochrome c oxidase assembly factor 3 homolog, mitochondrial (Coiled-coil domain-containing protein 56) (Mitochondrial translation regulation assembly intermediate of cytochrome c oxidase protein of 12 kDa)	COA3 CCDC56 MITRAC12 HSPC009
COX4I1	P13073	Cytochrome c oxidase subunit 4 isoform 1, mitochondrial (Cytochrome c oxidase polypeptide IV) (Cytochrome c oxidase subunit IV isoform 1) (COX IV-1)	COX4I1 COX4
COX5A	P20674	Cytochrome c oxidase subunit 5A, mitochondrial (Cytochrome c oxidase polypeptide Va)	COX5A
COX6C	P09669	Cytochrome c oxidase subunit 6C (Cytochrome c oxidase polypeptide VIc)	COX6C
DAP3	P51398	28S ribosomal protein S29, mitochondrial (MRP-S29) (S29mt) (Death-associated protein 3) (DAP-3) (Ionizing radiation resistance conferring protein) (Mitochondrial small ribosomal subunit protein mS29)	DAP3 MRPS29
DYNLL1	P63167	Dynein light chain 1, cytoplasmic (8 kDa dynein light chain) (DLC8) (Dynein light chain LC8-type 1) (Protein inhibitor of neuronal nitric oxide synthase) (PIN)	DYNLL1 DLC1 DNCL1 DNCLC1 HDLC1
DYNLL2	Q96FJ2	Dynein light chain 2, cytoplasmic (8 kDa dynein light chain b) (DLC8b) (Dynein light chain LC8-type 2)	DYNLL2 DLC2				Y
FAM98A	Q8NCA5	Protein FAM98A	FAM98A				Y	Y
G3BP1	Q13283	Ras GTPase-activating protein-binding protein 1 (G3BP-1) (EC 3.6.4.12) (EC 3.6.4.13) (ATP-dependent DNA helicase VIII) (hDH VIII) (GAP SH3 domain-binding protein 1)	G3BP1 G3BP				Y
G3BP2	Q9UN86	Ras GTPase-activating protein-binding protein 2 (G3BP-2) (GAP SH3 domain-binding protein 2)	G3BP2 KIAA0660				Y
HADHB	P55084	Trifunctional enzyme subunit beta, mitochondrial (TP-beta) [Includes: 3-ketoacyl-CoA thiolase (EC 2.3.1.16) (Acetyl-CoA acyltransferase) (Beta-ketothiolase)]	HADHB MSTP029
HNRNPUL1	Q9BUJ2	Heterogeneous nuclear ribonucleoprotein U-like protein 1 (Adenovirus early region 1B-associated protein 5) (E1B-55 kDa-associated protein 5) (E1B-AP5)	HNRNPUL1 E1BAP5 HNRPUL1				Y	Y	Y
IGF2BP1	Q9NZI8	Insulin-like growth factor 2 mRNA-binding protein 1 (IGF2 mRNA-binding protein 1) (IMP-1) (IMP1) (Coding region determinant-binding protein) (CRD-BP) (IGF-II mRNA-binding protein 1) (VICKZ family member 1) (Zipcode-binding protein 1) (ZBP-1)	IGF2BP1 CRDBP VICKZ1 ZBP1				Y			Y
MRPS16	Q9Y3D3	28S ribosomal protein S16, mitochondrial (MRP-S16) (S16mt) (Mitochondrial small ribosomal subunit protein bS16m)	MRPS16 RPMS16 CGI-132
MRPS18B	Q9Y676	28S ribosomal protein S18b, mitochondrial (MRP-S18-b) (Mrps18-b) (S18mt-b) (28S ribosomal protein S18-2, mitochondrial) (MRP-S18-2) (Mitochondrial small ribosomal subunit protein bS18b) (Mitochondrial small ribosomal subunit protein mS40)	MRPS18B C6orf14 HSPC183 PTD017
MRPS22	P82650	28S ribosomal protein S22, mitochondrial (MRP-S22) (S22mt) (Mitochondrial small ribosomal subunit protein mS22)	MRPS22 C3orf5 RPMS22 GK002
MRPS23	Q9Y3D9	28S ribosomal protein S23, mitochondrial (MRP-S23) (S23mt) (Mitochondrial small ribosomal subunit protein mS23)	MRPS23 CGI-138 HSPC329
MRPS26	Q9BYN8	28S ribosomal protein S26, mitochondrial (MRP-S26) (S26mt) (28S ribosomal protein S13, mitochondrial) (MRP-S13) (S13mt) (Mitochondrial small ribosomal subunit protein mS26)	MRPS26 C20orf193 RPMS13
MRPS27	Q92552	28S ribosomal protein S27, mitochondrial (MRP-S27) (S27mt) (Mitochondrial ribosomal protein S27) (Mitochondrial small ribosomal subunit protein mS27)	MRPS27 KIAA0264
MRPS28	Q9Y2Q9	28S ribosomal protein S28, mitochondrial (MRP-S28) (S28mt) (28S ribosomal protein S35, mitochondrial) (MRP-S35) (S35mt) (Mitochondrial small ribosomal subunit protein bS1m)	MRPS28 MRPS35 HSPC007
MRPS31	Q92665	28S ribosomal protein S31, mitochondrial (MRP-S31) (S31mt) (Imogen 38) (Mitochondrial small ribosomal subunit protein mS31)	MRPS31 IMOGN38
MRPS33	Q9Y291	28S ribosomal protein S33, mitochondrial (MRP-S33) (S33mt) (Mitochondrial small ribosomal subunit protein mS33)	MRPS33 CGI-139 PTD003
MRPS7	Q9Y2R9	28S ribosomal protein S7, mitochondrial (MRP-S7) (S7mt) (Mitochondrial small ribosomal subunit protein uS7m) (bMRP-27a) (bMRP27a)	MRPS7
PABPC1	P11940	Polyadenylate-binding protein 1 (PABP-1) (Poly(A)-binding protein 1)	PABPC1 PAB1 PABP1 PABPC2				Y		Y
PABPC3	Q9H361	Polyadenylate-binding protein 3 (PABP-3) (Poly(A)-binding protein 3) (Testis-specific poly(A)-binding protein)	PABPC3 PABP3 PABPL3
PABPC4	Q13310	Polyadenylate-binding protein 4 (PABP-4) (Poly(A)-binding protein 4) (Activated-platelet protein 1) (APP-1) (Inducible poly(A)-binding protein) (iPABP)	PABPC4 APP1 PABP4				Y
PGAM5	Q96HS1	Serine/threonine-protein phosphatase PGAM5, mitochondrial (EC 3.1.3.16) (Bcl-XL-binding protein v68) (Phosphoglycerate mutase family member 5)	PGAM5				Y
PGRMC1	O00264	Membrane-associated progesterone receptor component 1 (mPR) (Dap1) (IZA)	PGRMC1 HPR6.6 PGRMC
RAB10	P61026	Ras-related protein Rab-10	RAB10
RBM14	Q96PK6	RNA-binding protein 14 (Paraspeckle protein 2) (PSP2) (RNA-binding motif protein 14) (RRM-containing coactivator activator/modulator) (Synaptotagmin-interacting protein) (SYT-interacting protein)	RBM14 SIP					Y	Y
RPL10A	P62906	60S ribosomal protein L10a (CSA-19) (Large ribosomal subunit protein uL1) (Neural precursor cell expressed developmentally down-regulated protein 6) (NEDD-6)	RPL10A NEDD6
RPL11	P62913	60S ribosomal protein L11 (CLL-associated antigen KW-12) (Large ribosomal subunit protein uL5)	RPL11
RPL19	P84098	60S ribosomal protein L19 (Large ribosomal subunit protein eL19)	RPL19
RPL23	P62829	60S ribosomal protein L23 (60S ribosomal protein L17) (Large ribosomal subunit protein uL14)	RPL23
RPL24	P83731	60S ribosomal protein L24 (60S ribosomal protein L30) (Large ribosomal subunit protein eL24)	RPL24
RPL26	P61254	60S ribosomal protein L26 (Large ribosomal subunit protein uL24)	RPL26							Y
RPL27	P61353	60S ribosomal protein L27 (Large ribosomal subunit protein eL27)	RPL27
RPL30	P62888	60S ribosomal protein L30 (Large ribosomal subunit protein eL30)	RPL30
RPL31	P62899	60S ribosomal protein L31 (Large ribosomal subunit protein eL31)	RPL31
RPL36AL	Q969Q0	60S ribosomal protein L36a-like (Large ribosomal subunit protein eL42-like)	RPL36AL
RPL37A	P61513	60S ribosomal protein L37a (Large ribosomal subunit protein eL43)	RPL37A
RPL7A	P62424	60S ribosomal protein L7a (Large ribosomal subunit protein eL8) (PLA-X polypeptide) (Surfeit locus protein 3)	RPL7A SURF-3 SURF3
RPL8	P62917	60S ribosomal protein L8 (Large ribosomal subunit protein uL2)	RPL8
RPLP0	P05388	60S acidic ribosomal protein P0 (60S ribosomal protein L10E) (Large ribosomal subunit protein uL10)	RPLP0
RPLP0P6	Q8NHW5	60S acidic ribosomal protein P0-like (Large ribosomal subunit protein uL10-like)	RPLP0P6
RPLP1	P05386	60S acidic ribosomal protein P1 (Large ribosomal subunit protein P1)	RPLP1 RRP1
RPS15	P62841	40S ribosomal protein S15 (RIG protein) (Small ribosomal subunit protein uS19)	RPS15 RIG
RPS15A	P62244	40S ribosomal protein S15a (Small ribosomal subunit protein uS8)	RPS15A OK/SW-cl.82
RPS24	P62847	40S ribosomal protein S24 (Small ribosomal subunit protein eS24)	RPS24
RPS29	P62273	40S ribosomal protein S29 (Small ribosomal subunit protein uS14)	RPS29
RPS7	P62081	40S ribosomal protein S7 (Small ribosomal subunit protein eS7)	RPS7
PHGDH	O43175	D-3-phosphoglycerate dehydrogenase (3-PGDH) (EC 1.1.1.95) (2-oxoglutarate reductase) (EC 1.1.1.399) (Malate dehydrogenase) (EC 1.1.1.37)	PHGDH PGDH3
SLC25A31	Q9H0C2	ADP/ATP translocase 4 (ADP,ATP carrier protein 4) (Adenine nucleotide translocator 4) (ANT 4) (Solute carrier family 25 member 31) (Sperm flagellar energy carrier protein)	SLC25A31 AAC4 ANT4 SFEC
SNRPD2	P62316	Small nuclear ribonucleoprotein Sm D2 (Sm-D2) (snRNP core protein D2)	SNRPD2 SNRPD1
SNRPB	P14678	Small nuclear ribonucleoprotein-associated proteins B and B' (snRNP-B) (Sm protein B/B') (Sm-B/B') (SmB/B')	SNRPB COD SNRPB1						Y
SSR4	P51571	Translocon-associated protein subunit delta (TRAP-delta) (Signal sequence receptor subunit delta) (SSR-delta)	SSR4 TRAPD
STAU1	O95793	Double-stranded RNA-binding protein Staufen homolog 1	STAU1 STAU				Y
STAU2	Q9NUL3	Double-stranded RNA-binding protein Staufen homolog 2	STAU2				Y			Y
TMPO	P42166	Lamina-associated polypeptide 2, isoform alpha (Thymopoietin isoform alpha) (TP alpha) (Thymopoietin-related peptide isoform alpha) (TPRP isoform alpha) [Cleaved into: Thymopoietin (TP) (Splenin); Thymopentin (TP5)]	TMPO LAP2
TMPO	P42167	Lamina-associated polypeptide 2, isoforms beta/gamma (Thymopoietin, isoforms beta/gamma) (TP beta/gamma) (Thymopoietin-related peptide isoforms beta/gamma) (TPRP isoforms beta/gamma) [Cleaved into: Thymopoietin (TP) (Splenin); Thymopentin (TP5)]	TMPO LAP2
YBX1	P67809	Nuclease-sensitive element-binding protein 1 (CCAAT-binding transcription factor I subunit A) (CBF-A) (DNA-binding protein B) (DBPB) (Enhancer factor I subunit A) (EFI-A) (Y-box transcription factor) (Y-box-binding protein 1) (YB-1)	YBX1 NSEP1 YB1				Y
YBX3	P16989	Y-box-binding protein 3 (Cold shock domain-containing protein A) (DNA-binding protein A) (Single-strand DNA-binding protein NF-GMB)	YBX3 CSDA DBPA				Y
