# Supplementary material for: Definition of mechanisms of viral protein multifunctionality reveals key roles of ‘conformer diversity’ and RNA interaction in forming host interfaces
Source: Research Square preprint supplement (doi:10.21203/rs.3.rs-3915792/v1), 2024-02-01
Supplement: Supplementary file 3 [file b0ff7e6ddc94be0dc917433e.docx]

**Supplementary Table 2: SAXS results for CVS wt P1, P3, P3-KRm and P3-D289N.**

| SAXS data collection parameters: | | P1 P3 P3-KRm P3-D289N | |
| --- | --- | --- | --- |
|  |  |  | |
| Instrument/source | Australian Synchrotron SAXS/WAXS beamline equipped with Pilatus 1M detector and sheath-flow cell for SEC-SAXS. | | |
| Wavelength (Å) | 1.0332  12  250 × 130  3256  0.005 – 0.334    Comparison with scattering from 1 mm pure water  To transmitted intensity from beamstop counter.  1 s measurements from SEC-SAXS elution  295 | | |
| Beam energy (kEv) |
| Beam size (μm) |
| Sample-to-detector distance (mm) |
| *q* (Å-1) |
| Absolute scaling method |
| Normalization |
| Exposure time |
| Sample temperature (K) |
|  |  |  | |
| SEC-SAXS parameters |  |  | |
|  |  |  | |
| Column | Superose 6 5×150  0.4  5  50  3.02  25 mM HEPES, pH 7.4, 150 mM NaCl, 1 mM TCEP, 0.1% sodium azide | | |
| Flow rate (mL/min) |
| Concentration (mg/mL) |
| Injection volume (μL) |
| Average conc. (mg/mL) |
| Solvent |
|  | |  | |
| Software employed | |  | |
|  | |  | |
| SAXS data reduction | *I*(*q*) vs *q* using Scatterbrain 2.8.2, SEC-SAXS solvent subtraction using *CHROMIXS* from *ATSAS* 3.2.1  *PRIMUSqt* from *ATSAS* 3.2.1  *DAMMIN* from *ATSAS* 3.2.1  *CRYSOL* from *ATSAS* 3.2.1  *CORAL* from *ATSAS* 3.2.1 | | |
| Basic analysis (Guinier, *P(r)*, molecular mass) |
| *Ab initio* modelling |
| Calculation of theoretical intensities |
| Atomic structure (hybrid) modelling |
|  | |  | |
| Structural parameters | |  | |
|  | |  | |
| Mass from *V*c (kDa)  (expected mass, ratio to expected in brackets) |  | 88.1 (67.3, 1.3) 62.5 (56.1, 1.1) 65.8 (55.8, 1.18) 61.3 (56.1, 1.09) | |
| Guinier analysis | |  | |
| *R*g (Å) |  | 47.35± 0.24 41.79 ± 0.31 45.88 ± 0.32 39.42 ± 0.22 | |
| *I(0)* (cm-1) |  | 0.018 ± 0.00006 0.01 ± 0.00004 0.026 ± 0.00007 0.012 ± 0.00004 | |
| *qR*g min,max |  | 0.45, 1.29 0.44, 1.28 0.45, 1.22 0.33, 1.29 | |
| *P(r)* analysis | |  | |
| *R*g (Å) |  | 49.25 ± 0.02 41.60 ± 0.01 46.12 ± 0.03 40.01 ± 0.01 | |
| *D*max (Å) |  | 170.11 144.38 158.86 133.22 | |
| Porod volume (Å3) |  | 217946.00 13777.40 170341.00 122475.01 | |
|  |  |  | |
| Atomic modelling |  |  | |
|  | |  | |
| *CORAL* | |  | |  | |
| Starting structure | Homology models obtained using PDB ID: 3L32 (dimerization domain;DD) and PDB ID: 1VYI (CTD)) | |  |
| Symmetry assumptions | P2 (core and flexible residues) | | |
| Flexible residues modelled | 37 residues at N terminus (IDR1, 89 for P1), 52 residues in between DD and CTD (IDR2) | | |
| χ2 range | *0.45-0.27 1.1-1.2 0.82-0.99 0.88-1.0* | | |
| SASB Code | *SASDRB6 SASDRX4 SASDRZ4 SASDRY4* | | |
|  | |  | |  | |
|  |  |  | |
|  |  |  | |
|  |  |  | |
|  |  |  | |
|  | |  | |  |
|  |  |  | |
|  |  |  | |
|  |  |  | |
|  |  |  | |
|  |  |  | |
|  | |  | |
|  | |  | |
