# Supplementary material for: Definition of mechanisms of viral protein multifunctionality reveals key roles of ‘conformer diversity’ and RNA interaction in forming host interfaces
Source: Research Square preprint supplement (doi:10.21203/rs.3.rs-3915792/v1), 2024-02-01
Supplement: Supplementary file 4 [file da8fcea184cbf06708c35809.docx]

| Residue | Secondary structure | Wild Type  (kex x 10-3 min-1) | D289N  (kex x 10-3 min-1) | δΔG (kJ.mol-1) | KRm  (kex x 10-3 min-1) | δΔG (kJ.mol-1) |
| --- | --- | --- | --- | --- | --- | --- |
| A202 | α1 | 1.6 ± 0.3 | 1.3 ± 0.6 | 0.5 | 3.7 ± 0.4 | -2.1 |
| F215 | β1 | 1.6 ± 0.3 | 2.3 ± 0.6 | -0.9 | 7.4 ± 0.7 | -3.8 |
| F227 | 310 helix | 4.7 ± 0.3 | 4.1 ± 1.5 | 0.3 | 19.5 ± 2.5 | -3.5 |
| E240 | α2 | 1.2 ± 0.3 | 1.3 ± 0.4 | -0.2 | 2.6 ± 0.6 | -1.9 |
| V262 | α4 | 0.8 ± 0.1 | 1.0 ± 0.3 | -0.6 | 2.2 ± 1.3 | -2.5 |
| L277 | α5 | 2.2 ± 0.3 | 2.0 ± 0.3 | 0.2 | 4.4 ± 2.0 | -1.7 |

**Supplementary Table 4.** **Hydrogen-deuterium exchange for wt P protein CTD and mutants K214/R260 (KRm) and D289N.a**

a Exchange rates of peptide HN groups with 2H2O at pH 6.8 and 25 °C. Rates and free energy differences of exchange (δΔG) are given example protons throughout the protein.
